# Supplementary material
Source: MDPI journal article supplement (https://www.mdpi.com/2073-4344/11/9/1119)
Supplement: s1 [file s1 › catalysts-1375012-supplementary.pdf]

## Synthesis of linoleic acid 13-hydroperoxides from safflower oil utilizing lipoxygenase in a coupled enzyme system with *in situ* oxygen generation

Valentin Gala Marti, Anna Coenen, Ulrich Schörken

**Figure S1**

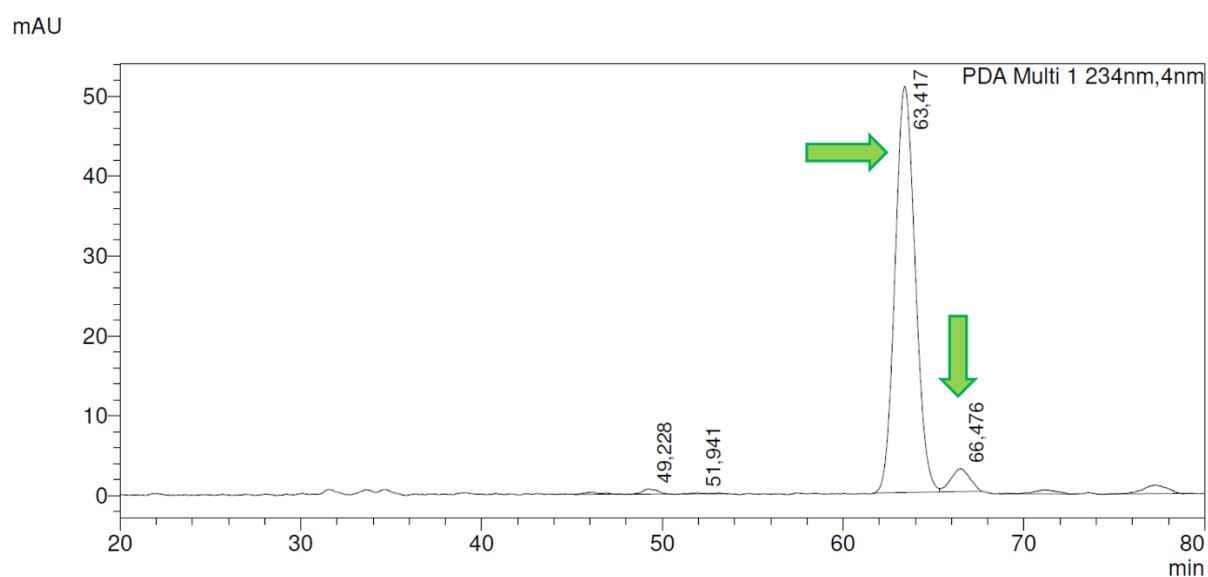

**Figure S1.** Exemplary chromatogram of the HPLC separation of regioisomers, peak assignment according to Larodan reference standards are 13-hydroxyoctadecadienoic acid (13-HODE) at 49.2 min, 9-hydroxyoctadecadienoic acid (9-HODE) at 51.9 min, 13-hydroperoxyoctadecadienoic acid (13-HPODE) at 63.4 min and 9-hydroperoxyoctadecadienoic acid (9-HPODE) at 66.4 min.

Figure S2

A)

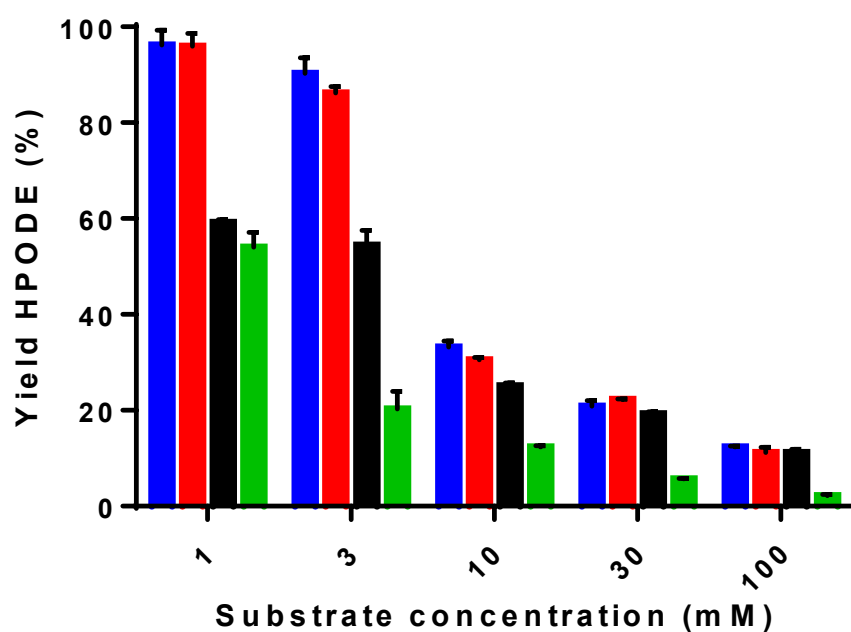

B)

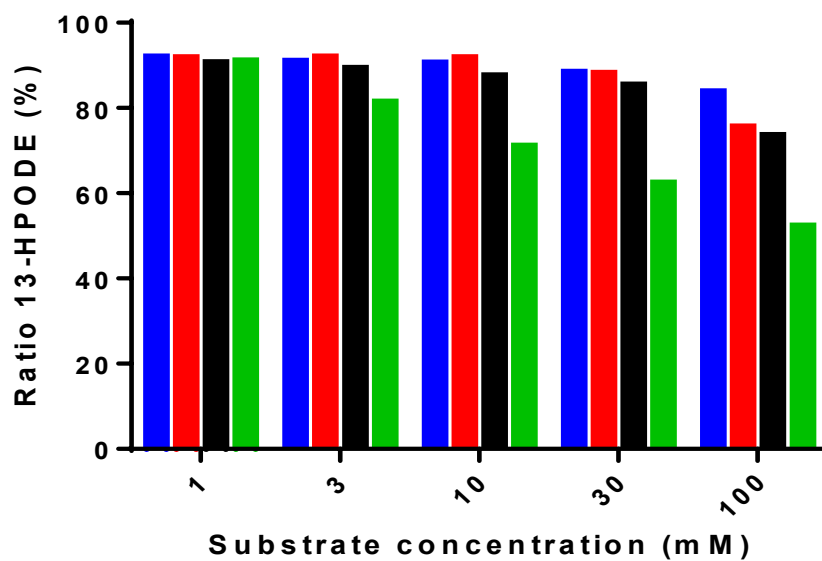

**Figure S2.** Effects of the linoleic acid concentration and oxygen flowrate on **A)** product formation and **B)** isomeric ratio of 13-HPODE by LOX-1. Influence of 100 ml/min oxygen flowrate (■), 50 ml/min oxygen flowrate (■), 20 ml/min oxygen flowrate (■) and without any oxygen supply (■) The reactions were carried out in 50 mM sodium borate buffer pH 9.0 containing 20,000 U/mmol substrate at different linoleic acid concentrations for 2 h.

**Figure S3**

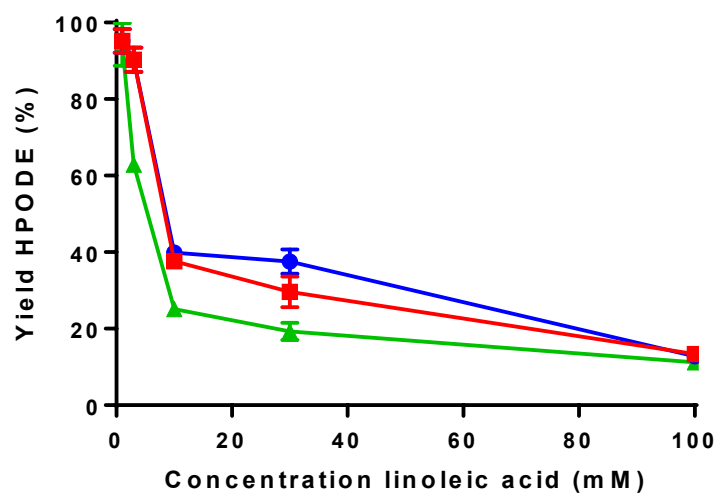

**Figure S3.** Influence of ultra-turrax (●) and ultrasonic (■) treatment in comparison to stirring (▲). The reactions were carried out in 50 mM sodium borate buffer pH 9.0 containing 20,000 U/mmol of substrate at different linoleic acid concentrations for 2 h.

**Figure S4**

A)

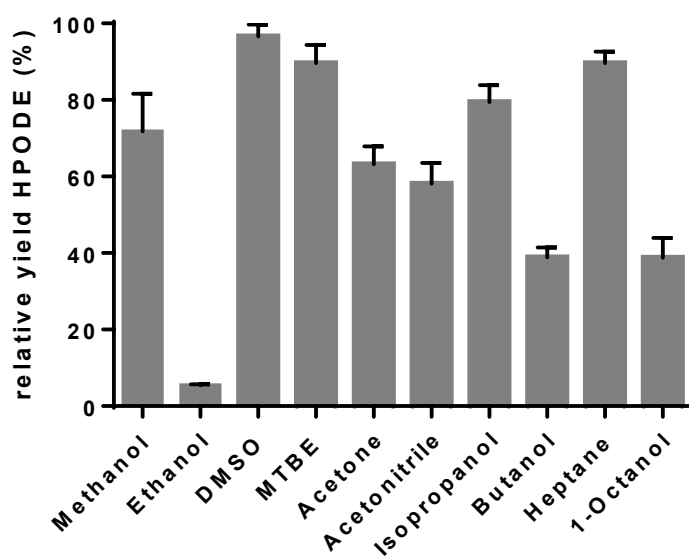

B)

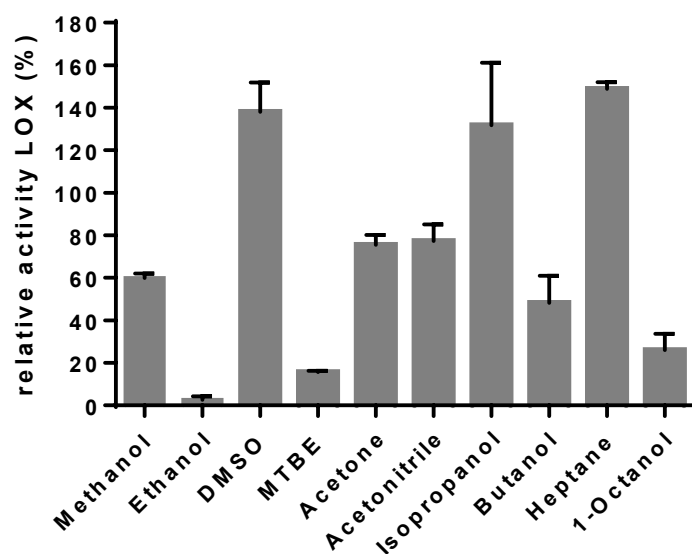

**Figure S4.** Overview of relative yield and relative initial activity when adding solvents in comparison to a system without solvent; **A)** Relative yield after 2 h reaction time in comparison to reference (35 % yield). **B)** Initial enzyme activity of LOX after addition of different solvents in a concentration of 5 %. (v/v). Addition of DMSO, MTBE and Heptane led to the highest overall yield in comparison to the addition of other solvents. When adding 5 % (v/v) Isopropanol, heptane oder DMSO, LOX shows an increased initial activity in comparison to reference.

**Figure S5**

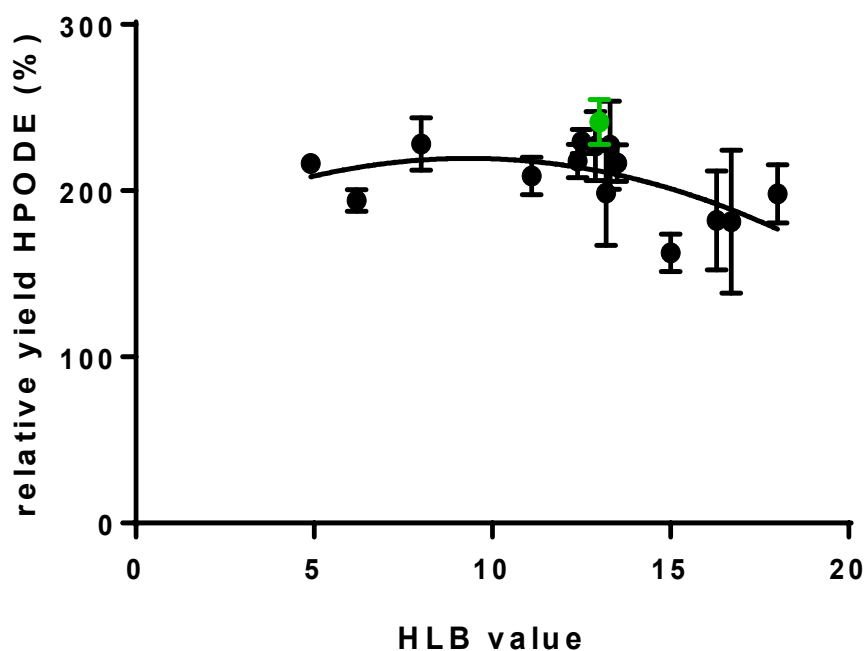

**Figure S5.** Influence of surfactant addition on HPODE yield; (a) HPODE yields in dependence of HLB-values of surfactants added to linoleic acid transformation at 100 mM substrate concentration. Relative yield of HPODE in the presence of Triton-CG 110 (●). Relative Yields were calculated against the reaction without surfactant. The detail results for each surfactant are given in Table 1.

**Figure S6**

**A)**

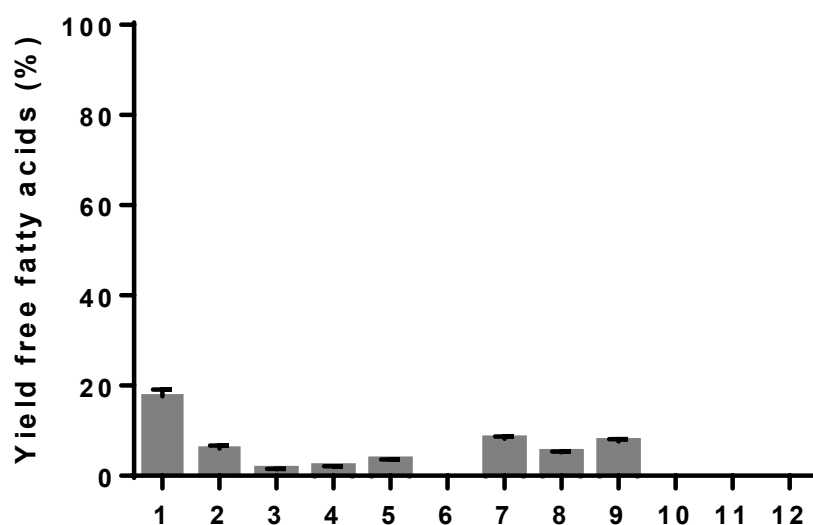

**B)**

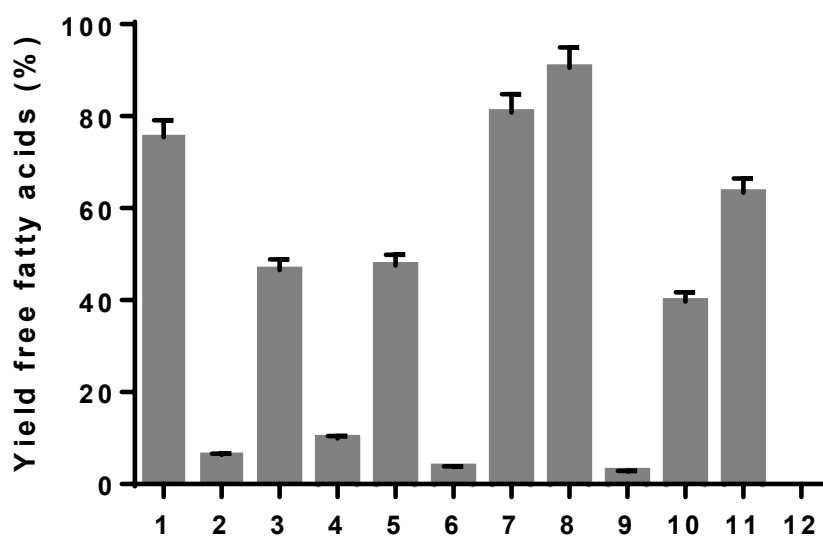

**Figure S6.** Lipase screening with safflower oil equivalent to 30 mM linoleic acid in the presence of 3 % Triton CG-110 (v/v substrate) and 5 % lipase (w/v substrate) in **A)** borate buffer pH 9 and **B)** Tris HCl buffer pH 8 with 1) Amano (*P. fluorescens*). 2) Amano G (*P. camemberti*). 3) Amano PS (*B. cepacia*). 4) Novozymes Lipolase 100 L (*T. lanuginosis*). 5) Novozymes Eversa Transform 2.0. 6) Novozymes CalB L (*P. antarctica*). 7) Amano AY 30 (*C. rugosa*). 8) Lipase CCL (*C. rugosa*). 9) Palatase 20000 L. 10) Amano F-AP 15. 11) Amano M (*M. javanicus*). 12) Amano A (*A. niger*).

**Figure S7**

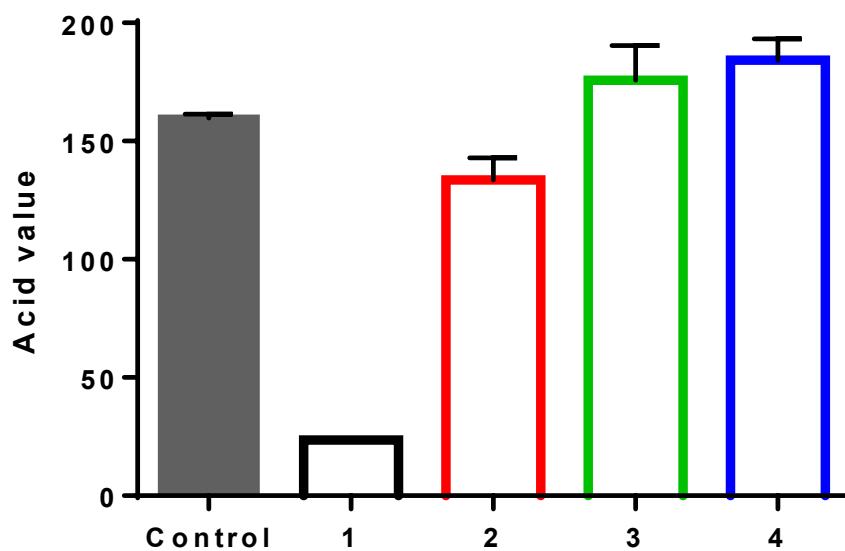

**Figure S7.** Acid values after termination of the reactions shown in Figure 4 (a), same color scheme was used  
■ = safflower oil hydrolysis control reaction without addition of LOX-1.

**Figure S8**

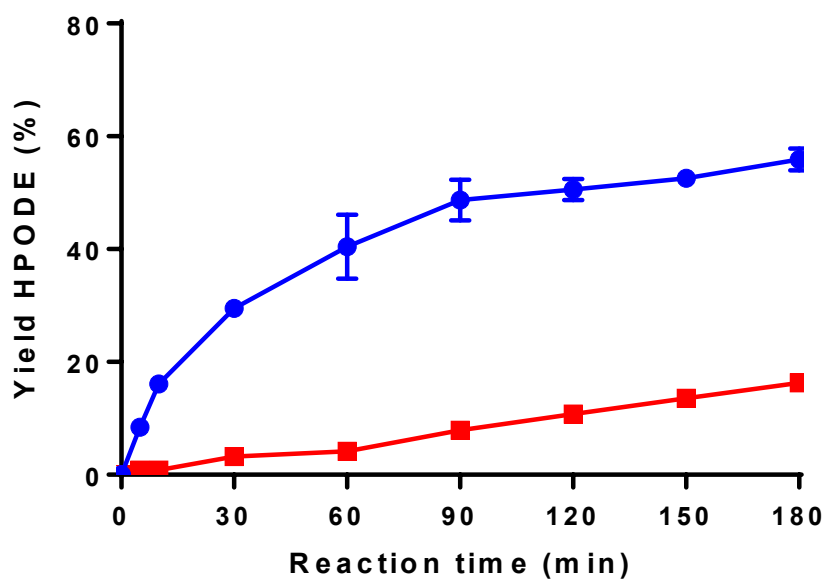

**Figure S8.** Comparison of linoleic acid (●) and monolinolein (■) transformation with 100,000 U LOX-1 / mmol of substrate.

**Figure S9**

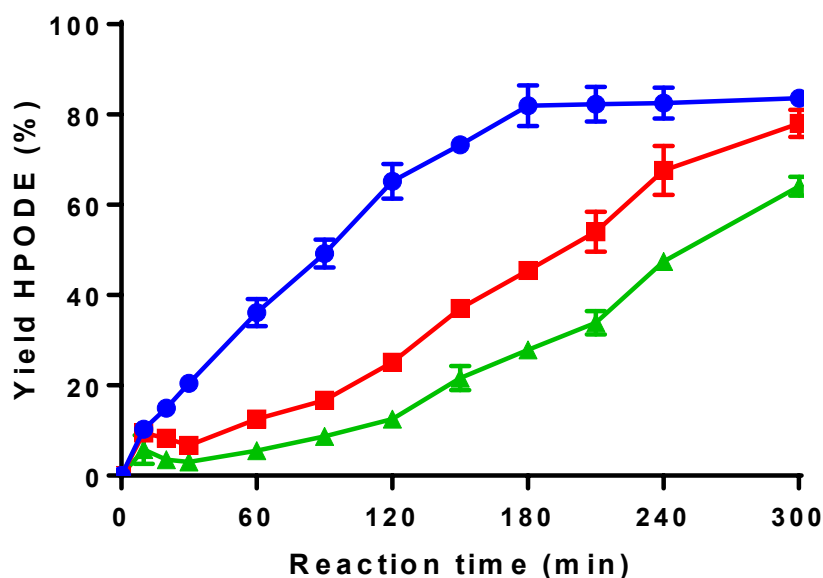

**Figure S9.** Comparison of HPODE yield with ( $\blacktriangle$ ) 2,000, ( $\blacksquare$ ) 5,000 and ( $\bullet$ ) 10,000 U LOX/mmol substrate dosage per h. Reaction was performed with safflower oil equivalent to 30 mM linoleic acid in the presence of 3 % Triton CG-110 (w/v substrate) at pH 8 with 10 % (w/v) *P. fluorescens* lipase and 50 ml/min  $O_2$  flow rate.

**Figure S10**

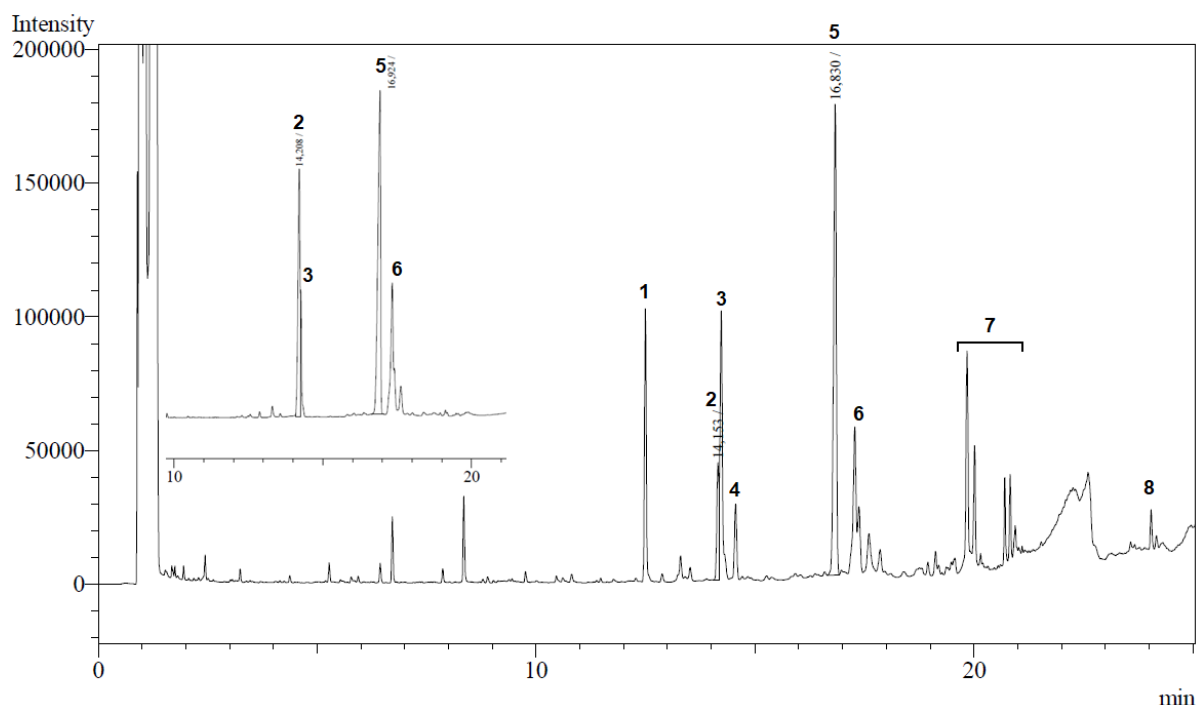

**Figure S10.** Comparative high-temperature GC analysis of the hydroperoxidation products after hydrogenation and silylation starting with safflower oil and linoleic acid (small cutout) – conditions with LOX-1 dosage as shown in Figure 4 a. Peak assignment was done with reference compounds: (1) palmitic acid, (2) linoleic acid, (3) oleic acid, (4) stearic acid, (5) hydroxyoctadecadienoic acid (HODE), (6) oxygenated byproducts, (7) monoglycerides, (8) diglycerides.

**Figure S11**

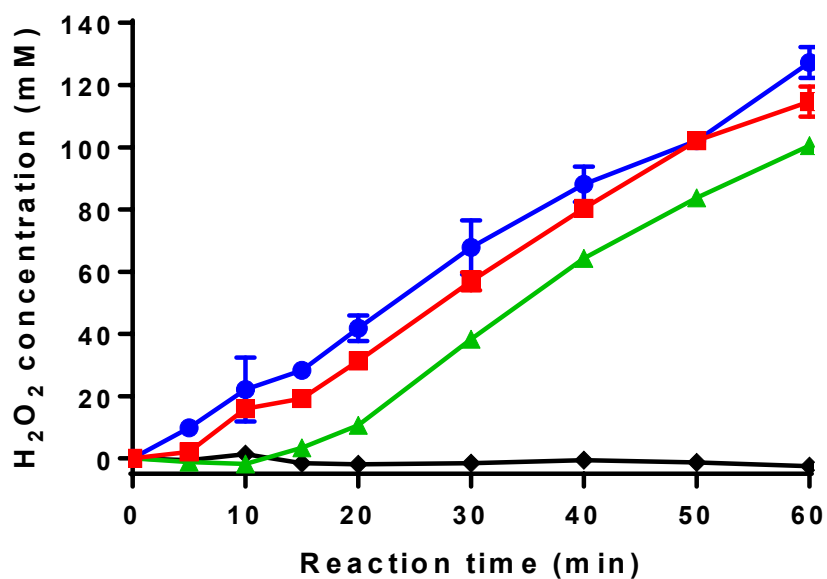

**Figure S11.** Evaluation of minimum amounts of catalase from *M. lysodeikticus* necessary to continuously remove  $H_2O_2$  at a flowrate equivalent to 50 ml/min oxygen bubbling over 60 min with ● = no catalase added, ■ = 100 U/ $\mu$ mol, ▲ = 300 U/ $\mu$ mol and ◆ = 1000 U/ $\mu$ mol

**Figure S12**

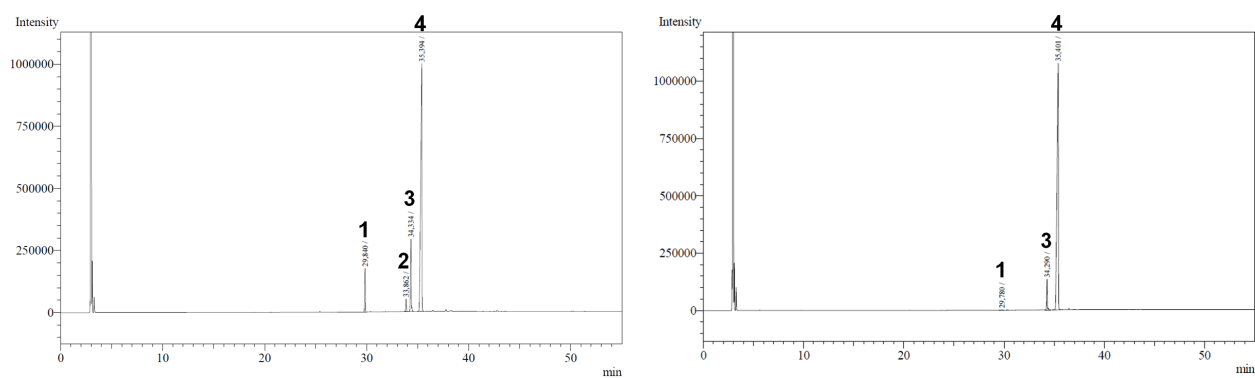

**Figure S12.** Comparative GC analysis of hydroperoxidation substrates after methylation with safflower oil (left) and urea-enriched linoleic acid (right). Peak assignment was done with reference compounds: (1) palmitic acid, (2) stearic acid, (3) oleic acid, (4) linoleic acid.
